# Supplementary material for: Selection of Parental Material to Maximize Heterosis Using SNP and SilicoDarT Markers in Maize
Source: PubMed Central journal article supplement (PMC6783910; doi:10.3390/plants8090349), 2019-09-14
Supplement: plants-08-00349-s001.pdf [file plants-08-00349-s001.pdf]

2378069

+ + + + + + + + + + + ns + ns + ns ns ns ns ns ns + + + + + + + + + + + ns +

---

# L - Łagiewniki, S - Smolice, @ 13 - 2013, 14 - 2014, + - significant, ns - not-significant
